# Supplementary material for: Metallic Conduction and Carrier Localization in Two-Dimensional BEDO-TTF Charge-Transfer Solid Crystals
Source: MDPI journal article supplement (doi:10.3390/cryst12010023), 2021-12-24
Supplement: s1 [file s1]

Archive with 1 entries (1 files):
- crystals-1494413-supplementary.pdf
