# Supplementary material for: Metallic Conduction and Carrier Localization in Two-Dimensional BEDO-TTF Charge-Transfer Solid Crystals
Source: MDPI journal article supplement (doi:10.3390/cryst12010023), 2021-12-24
Supplement: s1 [file s1 › crystals-1494413-supplementary.pdf]

## Metallic Conduction and Carrier Localization in Two-Dimensional BEDO-TTF Charge-Transfer Solid Crystals

Hiroshi Ito <sup>1,\*</sup>, Motoki Matsuno <sup>1</sup>, Seiu Katagiri <sup>1</sup>, Shinji K. Yoshina <sup>1</sup>, Taishi Takenobu <sup>1</sup>, Manabu Ishikawa <sup>2</sup>, Akihiro Otsuka <sup>2,3</sup>, Hideki Yamochi <sup>2,3</sup>, Yukihiro Yoshida <sup>2,4</sup>, Gunzi Saito <sup>4,5</sup>, Yongbing Shen <sup>6</sup> and Masahiro Yamashita <sup>6,7</sup>

<sup>1</sup> Department of Applied Physics, Nagoya University, Nagoya 464-8603, Japan

<sup>2</sup> Division of Chemistry, Graduate School of Science, Kyoto University, Kyoto 606-8502, Japan

<sup>3</sup> Research Center for Low Temperature and Materials Sciences, Kyoto University, Kyoto 606-8501, Japan

<sup>4</sup> Faculty of Agriculture, Meijo University, Nagoya 468-8502, Japan

<sup>5</sup> Toyota Physical and Chemical Research Institute, Nagakute 480-1192, Japan

<sup>6</sup> Department of Chemistry, Graduate School of Science, Tohoku University, Sendai 980-8578, Japan

<sup>7</sup> School of Materials Science and Engineering, Nankai University, Tianjin 300350, China

\* Correspondence: ito@nuap.nagoya-u.ac.jp

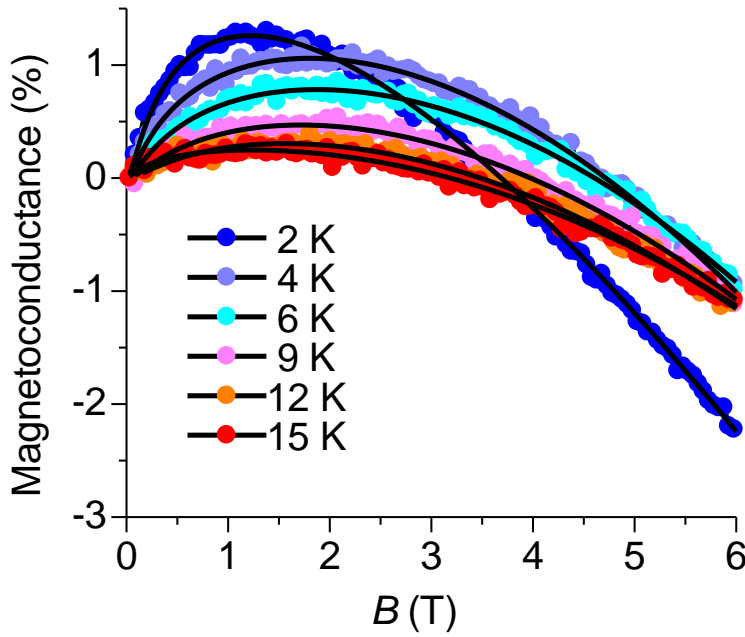

Figure S1: A typical fitting result for the magnetoconductance  $[\sigma(B)-\sigma(B=0)]/\sigma(B=0)$  of  $\beta''$ -BO3 #1 along the weak 2D localization model under the perpendicular magnetic field. Black lines represent fit curves with respect to Eq. (1). Obtained parameters by this fitting result are given in Table S1.

Table S1. Parameters,  $A_1$ ,  $A_2$ ,  $B_i$ , and  $\alpha$  and the phase coherence length  $\lambda$  obtained by the fitting of the magnetoconductance of  $\beta''$ -BO3 shown in Figure S1.

|      | $A_1$  | $A_2$   | $B_i$ (T) | $\alpha$ | $\lambda$ (nm) |
|------|--------|---------|-----------|----------|----------------|
| 2 K  | 0.0093 | 0.0046  | 0.026     | 1.39     | 80             |
| 4 K  | 0.0062 | 0.00092 | 0.031     | 1.95     | 73             |
| 6 K  | 0.0051 | 0.00059 | 0.040     | 2.08     | 63             |
| 9 K  | 0.0065 | 0.0012  | 0.094     | 1.71     | 42             |
| 12 K | 0.0063 | 0.0012  | 0.129     | 1.69     | 36             |
| 15 K | 0.0034 | 0.00087 | 0.074     | 1.75     | 47             |

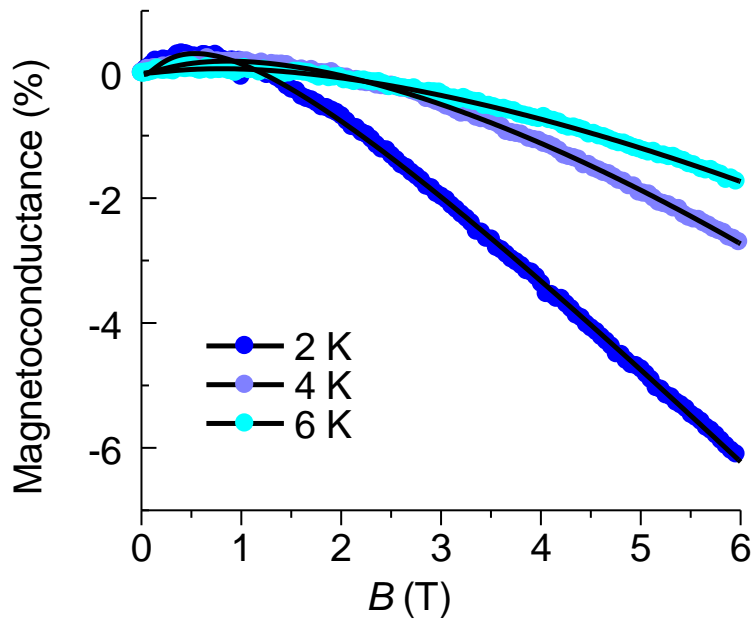

Figure S2: A typical fitting result for the magnetoconductance  $[\sigma(B)-\sigma(B=0)]/\sigma(B=0)$  of  $\beta''$ -BO3 #2 along the weak 2D localization model under the perpendicular magnetic field. Black lines represent fit curves with respect to Eq. (1). Obtained parameters by this fitting result are given in Table S2.

Table S2. Parameters,  $A_1$ ,  $A_2$ ,  $B_i$ , and  $\alpha$  and the phase coherence length  $\lambda$  obtained by the fitting of the magnetoconductance of  $\beta''$ -BO3 #2 shown in Figure S2.

|     | $A_1$  | $A_2$  | $B_i$ (T) | $\alpha$ | $\lambda$ (nm) |
|-----|--------|--------|-----------|----------|----------------|
| 2 K | 0.013  | 0.017  | 0.040     | 1.00     | 64             |
| 4 K | 0.0046 | 0.0026 | 0.074     | 1.52     | 47             |
| 6 K | 0.0025 | 0.0014 | 0.093     | 1.58     | 42             |

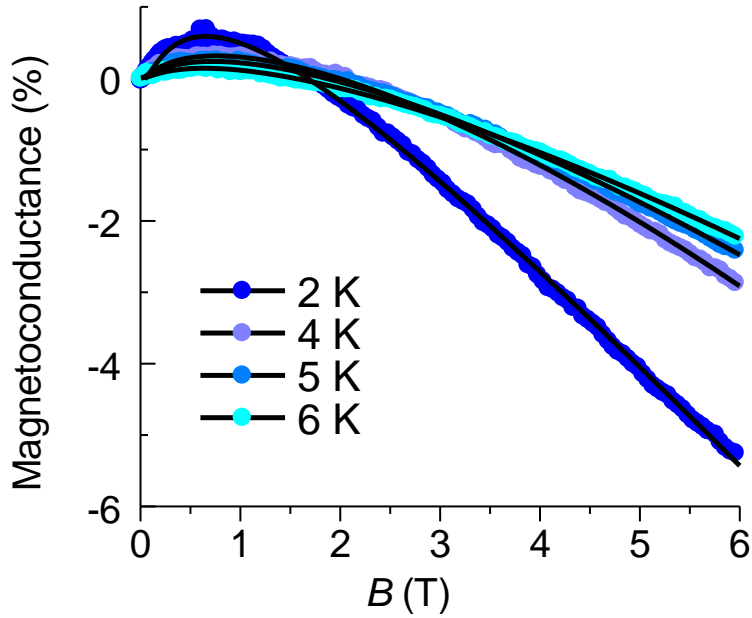

Figure S3: A typical fitting result for the magnetoconductance  $[\sigma(B)-\sigma(B=0)]/\sigma(B=0)$  of  $\beta''$ -BO3 #3 along the weak 2D localization model under the perpendicular magnetic field. Black lines represent fit curves with respect to Eq. (1). Obtained parameters by this fitting result are given in Table S3.

Table S3: Parameters,  $A_1$ ,  $A_2$ ,  $B_i$ , and  $\alpha$  and the phase coherence length  $\lambda$  obtained by the fitting of the magnetoconductance of  $\kappa$ -BO2 #3 shown in Figure S3.

|     | $A_1$  | $A_2$  | $B_i$ (T) | $\alpha$ | $\lambda$ (nm) |
|-----|--------|--------|-----------|----------|----------------|
| 2 K | 0.015  | 0.018  | 0.035     | 0.96     | 68             |
| 4 K | 0.011  | 0.0083 | 0.065     | 1.08     | 50             |
| 5 K | 0.0086 | 0.0063 | 0.070     | 1.12     | 48             |
| 6 K | 0.0075 | 0.0052 | 0.085     | 1.14     | 44             |

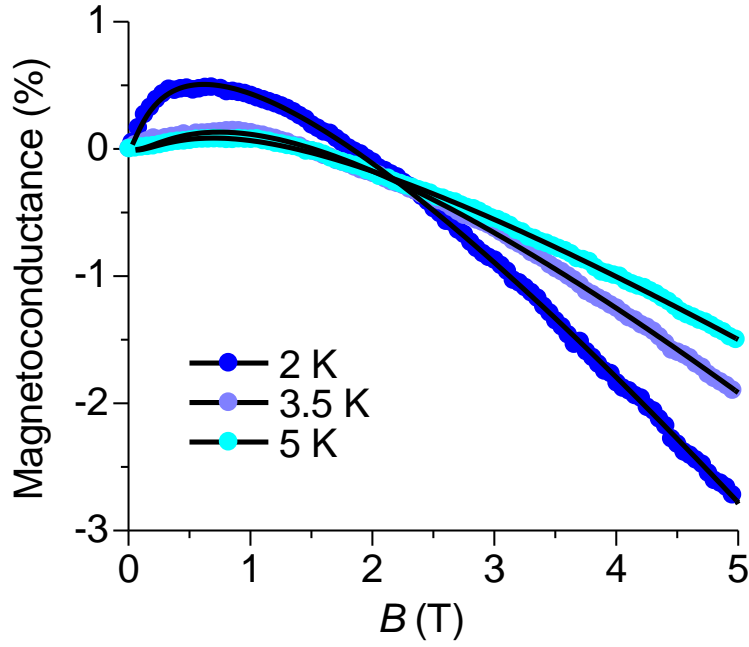

Figure S4: A typical fitting result for the magnetoconductance  $[\sigma(B)-\sigma(B=0)]/\sigma(B=0)$  of  $\kappa$ -BO2 #1 along the weak 2D localization model under the perpendicular magnetic field. Black lines represent fit curves with respect to Eq. (1). Obtained parameters by this fitting result are given in Table S4.

Table S4: Parameters,  $A_1$ ,  $A_2$ ,  $B_i$ , and  $\alpha$  and the phase coherence length  $\lambda$  obtained by the fitting of the magnetoconductance of  $\kappa$ -BO2 shown in Figure S4.

|       | $A_1$  | $A_2$  | $B_i$ (T) | $\alpha$ | $\lambda$ (nm) |
|-------|--------|--------|-----------|----------|----------------|
| 2 K   | 0.0057 | 0.0073 | 0.020     | 1.17     | 91             |
| 3.5 K | 0.0075 | 0.0055 | 0.082     | 1.16     | 45             |
| 5 K   | 0.0060 | 0.0051 | 0.076     | 1.08     | 47             |

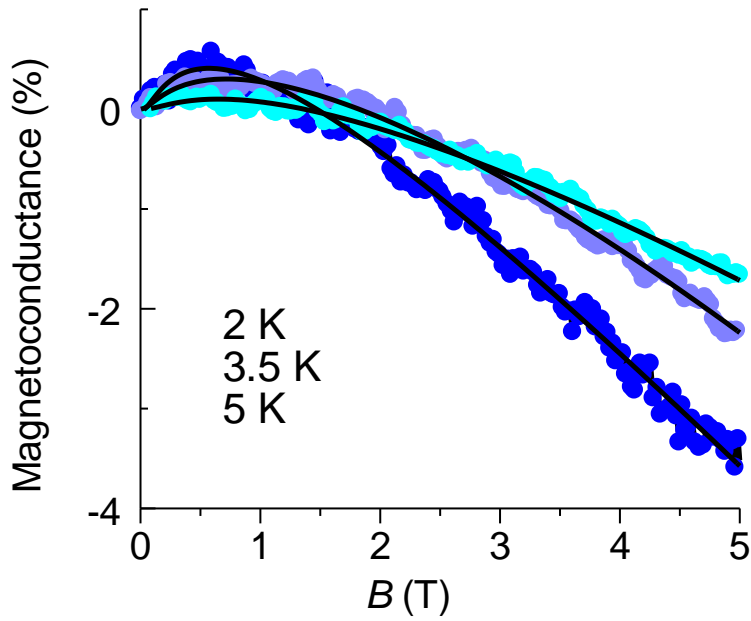

Figure S5: A typical fitting result for the magnetoconductance  $[\sigma(B)-\sigma(B=0)]/\sigma(B=0)$  of  $\kappa$ -BO2 #3 along the weak 2D localization model under the perpendicular magnetic field. Black lines represent fit curves with respect to Eq. (1). Obtained parameters by this fitting result are given in Table S5.

Table S5: Parameters,  $A_1$ ,  $A_2$ ,  $B_i$ , and  $\alpha$  and the phase coherence length  $\lambda$  obtained by the fitting of the magnetoconductance of  $\kappa$ -BO2 #3 shown in Figure S5.

|       | $A_1$  | $A_2$  | $B_i$ (T) | $\alpha$ | $\lambda$ (nm) |
|-------|--------|--------|-----------|----------|----------------|
| 2 K   | 0.0095 | 0.013  | 0.031     | 1.02     | 73             |
| 3.5 K | 0.0045 | 0.0041 | 0.036     | 1.34     | 68             |
| 5 K   | 0.0044 | 0.0037 | 0.068     | 1.24     | 49             |
